# Supplementary material
Source: Springer Nature journal article supplement (https://www.springermedizin.de/resource/supplementary/12985_2013_2512_MOESM5_ESM.pdf/9606902)

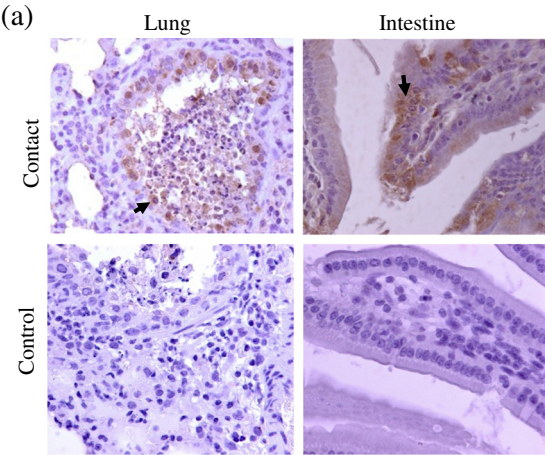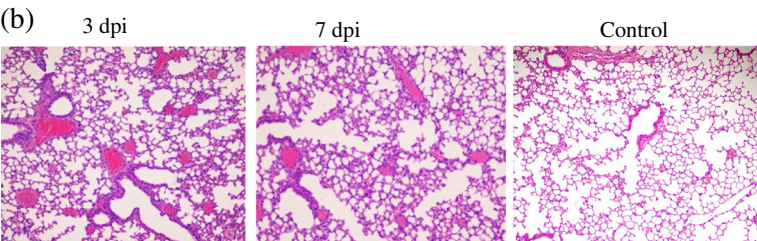

Supplement: MOESM5 [file 9606902]
